1 **Title of the article: Anti-SARS-CoV-2 Antibody Kinetics up to 6 months of follow-up: Result**  
2 **from a Nation-wide Population-based, Age Stratified Sero-Epidemiological Prospective**  
3 **Cohort Study in India**

4 Puneet Misra<sup>1</sup>, Arvind Kumar Singh<sup>2</sup>, Baijayantimala Mishra<sup>3</sup>, Bijayini Behera<sup>2</sup>, Binod Kumar  
5 Patro<sup>2</sup>, Guruprasad R Medigeshe<sup>4</sup>, Hari Shanker Joshi<sup>5</sup>, Mohammad Ahmad<sup>6</sup>, P K Chaturvedi<sup>7</sup>,  
6 Palanivel Chinnakali<sup>8</sup>, Partha Haldar<sup>1</sup>, Mohan Bairwa<sup>1</sup>, Pradeep Kharya<sup>5</sup>, Rahul Dhodapkar<sup>9</sup>,  
7 Ramashankar Rath<sup>5</sup>, Randeep Guleria<sup>10</sup>, Sanjay K Rai<sup>1</sup>, Sitanshu Sekhar Kar<sup>8</sup>, Shashi Kant<sup>1</sup>,  
8 Sonali Sarkar<sup>8</sup>, Subrata Baidya<sup>11</sup>, Suneeta Meena<sup>12</sup>, Suprakash Mandal<sup>1</sup>, Surekha Kishore<sup>13</sup>, Tapan  
9 Majumder<sup>14</sup>, Vivek Hada<sup>15</sup>

10

11 **Contributors\*:**

12 1. Centre for Community Medicine, All India Institute of Medical Sciences, New Delhi  
13 110029, India

14 2. Department of Community and Family Medicine, All India Institute of Medical Sciences,  
15 Bhubaneswar, Odisha- 751019, India

16 3. Department Microbiology, All India Institute of Medical Sciences, Bhubaneswar, Odisha-  
17 751019, India

18 4. Translational Health Science and Technology Institute, Faridabad-121001, India

19 5. Department of Community and Family Medicine, All India Institute of Medical Sciences,  
20 Gorakhpur- 273008, India

21 6. WHO Country Office, World Health Organization

22 7. Department of Reproductive Biology, All India Institute of Medical Sciences, New Delhi  
23 110029, India

24 8. Department of Community Medicine, Jawaharlal Institute of Postgraduate Medical  
25 Education and Research, Puducherry- 605006, India

26 9. Department of Microbiology, Jawaharlal Institute of Postgraduate Medical Education and  
27 Research, Puducherry- 605006, India

28 10. Director, All India Institute of Medical Sciences, New Delhi 110029, India  
NOTE: This preprint reports new research that has not been certified by peer review and should not be used to guide clinical practice.

- 29 11. Department of Community Medicine, Agartala Government Medical College, Agartala-  
30 799006, India
- 31 12. Department of Laboratory Medicine, All India Institute of Medical Sciences, New Delhi  
32 110029, India
- 33 13. Director, All India Institute of Medical Sciences, Gorakhpur- 273008, India
- 34 14. Department of Microbiology, Agartala Government Medical College, Agartala- 799006,  
35 India
- 36 15. Department of Microbiology, All India Institute of Medical Sciences, Gorakhpur, Uttar  
37 Pradesh, India

38 **\*After first and corresponding author, all others authors sequence is arranged alphabetically**

39 **Corresponding author and guarantor:**

40 Dr. Puneet Misra,  
41 Professor,  
42 Centre For Community Medicine  
43 Room Number: 30, Old OT Block  
44 All India Institute of Medical Sciences,  
45 New Delhi- 110029.  
46 Telephone: +91 (11) 26593773 (Direct)  
47 +91(11) 26593233 (Office)  
48 Mobile: +91-9810696386  
49 Mail: [doctormisra@gmail.com](mailto:doctormisra@gmail.com)  
50 Orcid ID: <https://orcid.org/0000-0002-2019-1524>

51 **Biographical Sketch of first author:**

52 Dr. Puneet Misra is Professor of Community Medicine at the All India Institute of Medical  
53 Sciences having over twenty years of experience as Physician, Researcher, Teacher,  
54 Epidemiologist and Public Health professional. His area of specialties are Public Health,  
55 Vaccine Trial, Clinical Trials, Epidemiologist, Yoga, chronic disease, life style medicine etc.

56

57

58 **Total number of pages: 12**

59 **Total number of photographs: Nil**

60 **Word count of abstract:** 301

61 **Word count for text (excluding reference, tables, abstract):** 2761

62 **Word count for introduction and discussion:** 893

63 **Conflicts of interest:** Nil.

64 **Source of funding:** This work was supported by a research grant (Ref No: **2020/1085497**,  
65 Purchase Order: **202630166**) from the WHO Country Office, New Delhi 110016, India.

66 **Previous presentation/submission:** None

### 67 **Acknowledgement**

68 We thank the WHO Country Office, India team particularly Mohammad Ahmad (National  
69 Professional Officer, WHO) and Anisur Rahman (Health Emergencies and Research Officer,  
70 WHO) for continuous support. We are immensely thankful to Meenu Sangral, Research  
71 Officer; Shreya Jha, Senior Research Consultant; Priyanka Kardam, Research Officer; Kapil  
72 Yadav, Professor; Bratati Pal, Research Officer; Tanushree Roy, Research officer for their  
73 support. Special thanks to the participants who allowed us to investigate the extent of infection,  
74 as determined by seropositivity in the general population, in which COVID-19 virus infection  
75 has been reported.

76 **Author statement:** All co-authors have read and approved this manuscript. The corresponding  
77 author attests that all listed authors meet authorship criteria and that no others meeting the  
78 criteria have been omitted. This manuscript represents the honest work done in this multisite  
79 sero-epidemiological study

80

81

| <b>Contributor</b> | <b>Concept</b> | <b>Design</b> | <b>Literature search</b> | <b>Data acquisition and analysis</b> | <b>Manuscript preparation</b> | <b>Manuscript editing</b> | <b>Manuscript review</b> |
|--------------------|----------------|---------------|--------------------------|--------------------------------------|-------------------------------|---------------------------|--------------------------|
| Puneet Misra       | √              | √             | √                        | -                                    | √                             | √                         | √                        |

|                        |   |   |   |   |   |   |   |
|------------------------|---|---|---|---|---|---|---|
| Arvind Kumar Singh     | √ | √ | - | √ | - | - | √ |
| Baijayantimala Mishra  | - | - | - | √ | - | - | √ |
| Bijayini Behera        | - | - | - | √ | - | - | √ |
| Binod Kumar Patro,     | - | - | - | √ | - | - | √ |
| Guruprasad R Medigeshi | √ | √ | - | √ | - | - | √ |
| Hari Shanker Joshi     | √ | √ | - | - | - | - | √ |
| Mohammad Ahmad         | √ | √ | - | - | - | - | √ |
| Mohan Bairwa           | - | √ | - | - | - | - | √ |
| P K Chaturvedi         | √ | √ | - | √ | - | - | √ |
| Palanivel Chinnakali   | √ | √ | - | √ | - | - | √ |
| Partha Haldar          | - | - | - | √ | - | - | √ |
| Pradeep Kharya         | - | - | - | √ | - | - | √ |
| Puneet Misra           | √ | √ | √ | - | √ | √ | √ |
| Rahul Dhodapkar        | - | - | √ | √ | - | - | √ |
| Ramashankar Rath       | - | - | - | √ | - | - | √ |

|                        |   |   |   |   |   |   |   |
|------------------------|---|---|---|---|---|---|---|
| Randeep<br>Guleria     | √ | √ | - | - | - | - | √ |
| Sanjay K Rai           | √ | √ | - | - | - | - | √ |
| Shashi Kant            | √ | √ | √ | - | √ | √ | √ |
| Sitanshu<br>Sekhar Kar | - | - | - | √ | - | - | √ |
| Sonali Sarkar          | - | - | - | √ | - | - | √ |
| Subrata<br>Baidya      | √ | √ | - | √ | - | - | √ |
| Suneeta<br>Meena       | - | - | - | √ | - | - | √ |
| Suprakash<br>Mandal    | - | - | √ | √ | √ | √ | √ |
| Surekha<br>Kishore     | √ | √ | - | - | - | - | √ |
| Tapan<br>Majumder      | - | - | - | √ | - | - | √ |
| Vivek Hada             | - | - | - | √ | - | - | √ |

82

83

84

85

86

87

88

89 Title: **Anti SARS-CoV-2 Antibody Kinetics up to 6 months of follow-up: Result from a**  
90 **Nation-wide Population-based, Age Stratified Sero-Epidemiological Prospective Cohort**  
91 **Study in India**

92  
93 **Abstract:**

94 Repeated serological testing tells about the change in the overall infection in a community. This  
95 study aimed to evaluate changes in antibody prevalence and kinetics in a closed cohort over six  
96 months in different sub-populations in India. The study included 10,000 participants from rural  
97 and urban areas in five states and measured SARS-CoV-2 antibodies in serum in three follow-up  
98 rounds. The overall seroprevalence increased from 73.9% in round one to 90.7% in round two and  
99 92.9% in round three. Among seropositive rural participants in round one, 98.2% remained  
100 positive in round two, and this percentage remained stable in urban and tribal areas in round three.  
101 The results showed high antibody prevalence that increased over time and was not different based  
102 on area, age group, or sex. Vaccinated individuals had higher antibody prevalence, and nearly all  
103 participants had antibody positivity for up to six months.

104 **Keywords:** Serology, Antibody, SARS-CoV-2, longitudinal

105

106

107

108

109

110

111

112

113

114

115

## 116 INTRODUCTION

117 The COVID-19 pandemic remains an important public health issue since 2019. Since its onset,  
118 several waves were seen in different countries throughout the world in different time periods.[1,2]  
119 In India, the first wave was seen from March to November 2020. The second wave in the form of  
120 the delta variant, from March to June 2021, led to a massive surge of symptomatic COVID,  
121 hospitalization, and fatality.[3] There was a subsequent third wave of less virulent omicron variant  
122 at the end of 2021. For almost 3 years India experienced this series of the pandemic waves, which  
123 had impact on population health. India started the COVID-19 vaccination in January 2021;  
124 initially for the health care workers, and frontline workers followed by the elderly population, and  
125 finally for all adults.[4]  
126 India, as well as most parts of the world, has entered the phase of endemicity where a substantial  
127 proportion of the population is positive for SARS-CoV-2 antibody.[5] Varying levels of  
128 seropositivity were found among the population of different states of India. The seropositivity  
129 status of a population indicates the extent of past infection, the indirect protection from subsequent  
130 infection, the proportion of the susceptible population, etc. Similarly, repeated serological testing  
131 tells about the change in the overall infection in a community. There were very few studies in  
132 cohort design assessing the antibody kinetics for a longer duration. Therefore, we aimed to assess  
133 the change in antibody prevalence and its kinetics in a closed cohort over six months across the  
134 country in different sub-population in India.

135

## 136 METHODOLOGY

137 **Study Design:** This was a population-based, multi-centric, age-stratified prospective cohort study  
138 under WHO (World Health Organisation) Unity protocols for the SARS-CoV-2 sero-surveillance.  
139 [6] A total of three rounds of follow-up were done for the same cohort of the study participants  
140 viz. at baseline, 3<sup>rd</sup> months, and 6<sup>th</sup> months.

141 **Study Setting and Patient Selection:** The study was conducted at five selected study sites in  
142 India. The study sites were Delhi, Bhubaneswar, Gorakhpur, Pondicherry, and Agartala situated in  
143 the state of Delhi, Odisha, Uttar Pradesh, Pondicherry, and Tripura respectively (**Figure 1**).

144 **Figure 1.** Geographical distribution of the study sites across India

145  
146 The study population were from both the rural and urban areas of each site except at the Agartala  
147 site where the tribal population was included in place of the urban population. For Delhi site, an  
148 urban resettlement colony consisting mostly of a population from low socio-economic strata in the  
149 south Delhi district was chosen to represent urban population. The rural population was selected  
150 from Ballabgarh block in the Faridabad district of nearby Haryana state. Faridabad district had  
151 contiguous border with Delhi state and came under Delhi National Capital Region (Delhi NCR).  
152 Ballabgarh block was the rural field practice area of the investigating site spread across 50 square  
153 kilometres with 28 villages with a population of 102,000 as per 2021 data. The Bhubaneswar site  
154 in south-Eastern India included an urban area under the Bhubaneswar Municipal Corporation  
155 (BMC) and a rural area at selected villages of adjacent Khordha districts at a distance of 25-40  
156 kilometres from the site institute. Gorakhpur was a city situated in Uttar Pradesh, a state in  
157 Northern India. The city was a major transit point of surface transport near the India-Nepal  
158 international border. The rural area was in the vicinity of the city with an average distance of 16-  
159 72 kilometres from the city centre whereas the urban area was in the centre of the city in a selected  
160 municipality block. In north-eastern India, the Agartala site was situated in the state of Tripura.  
161 This site included the rural and tribal population from the selected villages situated at a distance of  
162 16-30 km from the city centre. In southern India, the Puducherry site was a Union Territory of an  
163 area of 20 square kilometres where selected municipality wards and villages were included for the  
164 urban and rural population.

165 **Sample Size and Sampling Strategy:** In each of the study sites, population both from an urban  
166 and rural area (except Agartala: rural and tribal) were included. Individual villages in the rural



167 area and municipality wards in the urban area were considered as a cluster. From each rural and  
168 urban area, 25 clusters were selected purposively. From each cluster, 40 participants were selected  
169 to finally achieve 1,000. Therefore, each study site had a sample size of 2,000 and the total sample  
170 size for the study was 10,000. The recruitment of the participants started from a meeting point of  
171 multiple lanes of a cluster preferably at the centre. The rotating pencil method was used to identify  
172 the first starting lane where  $\geq 10$  consecutive families were approached. From those houses, at  
173 least 40 participants having age more than equal to 1 year were recruited. The rule of the left was  
174 adopted to move further at the end of any lane.

175 **Outcome Measures:** Our main outcome measure was the presence or absence of antibodies  
176 against the SARS-CoV-2 virus in serum. It was assessed by standard Enzyme-linked  
177 Immunoassay (ELISA) (Kit: WANTAI SARS-CoV-2 Ab ELISA kit, Wantai SARS-CoV-2  
178 Diagnostics) as per the manufacturer's protocol. The kit captured human serum total antibody  
179 (IgM + IgG) against the receptor binding domain of spike protein of the SARS-Cov-2 virus and  
180 detected the antibody qualitatively. The sensitivity and specificity of the test kit were 94.4% and  
181 100% respectively. [7] Those serum specimens having a ratio of observed absorbance to cut-off  
182 (O/C)  $\geq 1.0$  was taken as reactive for the antibody.

183 **Biological Specimen Collection and Handling:** Three to five millilitre of venous blood sample  
184 was collected by aseptic venepuncture from each participant. The blood sample was centrifuged  
185 (at 3000 rpm for 10 minutes) within two hours of collection. Serum was stored at 2-8 degree  
186 Celsius for laboratory analysis within seven days, otherwise at -80 degrees Celsius for long-term  
187 storage. The standard operating procedure for handling biological samples was followed.

188 **Other Variable:** We interviewed the adult participants and the guardian of the minor participants  
189 to obtain basic socio-demographic details like age, sex, residence, educational status, occupation,  
190 any substance use, any clinical symptoms experienced in the past three months, history of SARS-  
191 CoV-2 laboratory test, COVID-19 vaccination status, etc.

192 **Data Collection Tool and Data Quality Management:** We used electronic tablet-based Epi-  
193 Collect 5 data collection software to enter the data of participants' interviews as well as data of  
194 laboratory results. The web portal of Epi-Collect 5 was used to do real-time based monitoring of  
195 the progress, identifying any data entry error, incompleteness, and data mismatch simultaneously  
196 during the period of data collection. The appropriate prompt action was taken to resolve issues  
197 that appeared at any of the study site. Periodic data download and cross-checking were also done  
198 to find any discrepancies by a designated data manager. A weekly progress report was obtained  
199 and discussed with all the study sites to ensure timely data collection and maintaining quality.  
200 Apart from this periodic refresher training and study site review meetings were conducted to  
201 address the site-specific issues and ensure timely dissemination of quality data. Standard state-  
202 specific COVID-appropriate guideline was followed during the data collection. The uploaded data  
203 were exported to Microsoft Excel format and merged with the subsequent round of data with the  
204 help of unique identification numbers.

205 **Data Analysis:** Data data analysis was done by STATA Version 12 (STATA Corporation, Texas,  
206 USA) statistical software. Data cleaning was done with the help of both Microsoft Excel and  
207 STATA by a qualified data manager as well as by the study investigators. Descriptive statistical  
208 analysis was done and the result was expressed by frequency and proportion for categorical  
209 variables and mean (SD), 95% confidence interval (CI) for the continuous variable. The  
210 seroprevalence was presented by percentage and with 95% CI by on the study site, round, urban-  
211 rural area, age group, sex, according to symptoms, and vaccination status.

212 **Ethical Approval and Consent to Participate:** Ethical approval was obtained from all five  
213 investigating institutes (Letter No. For AIIMS, New Delhi: **IEC-959/04.09.2020**, AIIMS  
214 Bhubaneswar: **T/EMF/CM&FM/20/44**, JIPMER Puducherry: **JIP/IEC/2020/248**, AIIMS  
215 Gorakhpur: **IHEC/AIIMS-GKP/BMR/01/22**, Agartala: **F.4(5-234)/AGMC/ACADEMIC/IEC**

216 **MEETING**). We obtained informed written consent, assent, and consent from the  
 217 parents/guardians of the participants who were under the legal age for giving consent.

218

219 **RESULTS**

220 The data collection period was from March 2021 to August 2021 in round one, from May 2021 to  
 221 December 2021 in round two, and from August 2021 to January 2022 in round three.

222 **(Supplementary Table 1.)**

223 **Supplementary Table 1. The period of the data collection according to the study site and area**

224

| Study Site                      | Area          | Round One                      | Round Two                      | Round Three                    |
|---------------------------------|---------------|--------------------------------|--------------------------------|--------------------------------|
| <b>AIIMS, New Delhi</b>         | <b>Rural</b>  | March 3, 2021 – June 10, 2021  | May 27, 2021 – Oct 18, 2021    | August 26, 2021 – Dec 31, 2021 |
|                                 | <b>Urban</b>  | March 15, 2021 – July 31, 2021 | June 18, 2021 – Oct 26, 2021   | Sept 28, 2021 – Dec 11, 2021   |
| <b>AIIMS, Bhubaneswar</b>       | <b>Rural</b>  | March 22, 2021 – May 7, 2021   | July 9, 2021 – August 11, 2021 | Oct 11, 2021 – Dec 19, 2021    |
|                                 | <b>Urban</b>  | June 7, 2021 – June 30, 2021   | Sept 6, 2021 – Oct 11, 2021    | Oct 12, 2021 – Jan 14, 2022    |
| <b>AIIMS, Gorakhpur</b>         | <b>Rural</b>  | April 22, 2021 - June 29, 2021 | July 24, 2021 – Oct 4, 2021    | Oct 12, 2021 – Dec 19, 2021    |
|                                 | <b>Urban</b>  | July 1, 2021 – August 18, 2021 | Oct 5, 2021 – Nov 27, 2021     | Dec 18, 2021 – Jan 10, 2022    |
| <b>Agartala Medical College</b> | <b>Rural</b>  | 26 March 2021 – June 1, 2021   | July 12, 2021 – Dec 10, 2021   | Sept 20, 2021 – Dec 31, 2021   |
|                                 | <b>Tribal</b> | 17 June 2021 – August 7, 2021  | Sept 14, 2021 – Nov 29, 2021   | Dec 15, 2021 – Dec 31, 2021    |
| <b>JIPMER, Pondicherry</b>      | <b>Rural</b>  | June 9, 2021 – July 30, 2021   | Sept 1, 2021 – Nov 23, 2021    | Oct 12, 2021 – Dec 27, 2021    |
|                                 | <b>Urban</b>  | June 10, 2021 – July 23, 2021  | Sept 2, 2021 – Nov 27, 2021    | Oct 12, 2021 – Dec 28, 2021    |

225

226 The total number of participants in round one was 10,110 for all sites clubbed together. In the  
 227 subsequent rounds, 6,503 (64.3%) remained in round two and 5,564 (55.0%) in round three. The  
 228 highest proportion of participants who remained in the cohort till round three was at the

229 Bhubaneswar site (73.6%), whereas the minimum was at the Pondicherry site (33.1%).

230 **(Supplementary Table 2.)**

231 **Supplementary Table 2: Distribution of participants by to the study site, round, and area**

232

| Study site  | Area   | Round One<br>n (%) |                 | Round Two<br>n (%) |                      | Round Three<br>n (%) |                      |
|-------------|--------|--------------------|-----------------|--------------------|----------------------|----------------------|----------------------|
|             |        | Total              | Area wise*      | Total              | Area wise            | Total                | Area wise            |
| Delhi       | Urban  | 2060<br>(100%)     | 1001<br>(47.2%) | 1569<br>(76.2%)    | 741/1001<br>(74.0%)  | 1395<br>(67.7%)      | 780/1001<br>(77.9%)  |
|             | Rural  |                    | 1059<br>(52.8%) |                    | 828/1059<br>(78.2%)  |                      | 708/1395<br>(66.8%)  |
| Bhubaneswar | Urban  | 2000<br>(100%)     | 1000<br>(50.0%) | 1704<br>(85.2%)    | 820/1000<br>(82.0%)  | 1473<br>(73.6%)      | 777/1000<br>(77.7%)  |
|             | Rural  |                    | 1000<br>(50.0%) |                    | 884/1000<br>(88.4%)  |                      | 700/1000<br>(70.0%)  |
| Gorakhpur   | Urban  | 2010<br>(100%)     | 1002<br>(49.8%) | 1151<br>(57.3%)    | 553/1002<br>(55.2%)  | 937<br>(46.6%)       | 509/940<br>(50.8%)   |
|             | Rural  |                    | 1008<br>(50.2%) |                    | 598/1008<br>(59.3%)  |                      | 431/1008<br>(42.7%)  |
| Agartala    | Tribal | 2000<br>(100%)     | 1339<br>(66.9%) | 856<br>(42.8%)     | 489/1339<br>(36.5%)  | 1095<br>(54.7%)      | 672/1339<br>(31.7%)  |
|             | Rural  |                    | 661<br>(33.1%)  |                    | 368/661<br>(55.6%)   |                      | 423/639<br>(63.9%)   |
| Pondicherry | Urban  | 2040<br>(100%)     | 1020<br>(50.0%) | 1222<br>(59.9%)    | 601/1020<br>(49.2%)  | 664<br>(33.1%)       | 322/1020<br>(31.6%)  |
|             | Rural  |                    | 1020<br>(50.0%) |                    | 621/1020<br>(60.1%)  |                      | 352/1020<br>(34.5%)  |
| Total       | Urban  | 10110<br>(100%)    | 4023<br>(39.7%) | 6503<br>(64.3%)    | 2715/4023<br>(67.5%) | 5564<br>(55.0%)      | 2164/4023<br>(53.7%) |
|             | Rural  |                    | 4748<br>(46.9%) |                    | 3229/4748<br>(69.5%) |                      | 2728/4748<br>(57.4%) |
|             | Tribal |                    | 1339<br>(13.2%) |                    | 489/1339<br>(36.5%)  |                      | 672/1339<br>(50.2%)  |

233 \*Column % is given whereas for all other figures, the denominator is the number of round one

234

235 In round two higher proportion of participants from the rural area remained in the study compared

236 to the urban participants across all sites. In contrast to this, higher attrition rate was seen in the

237 rural area in round three across all sites. **(Supplementary Table 2.)** The overall proportion of

238 males in all three rounds was lower than females. The recruited participants were mostly older

239 than 10 years and younger than 60 years. This age group formed nearly 70% of all the participants

240 and remained stable across the three rounds. **(Supplementary Table 3.)**

241 **Supplementary Table 3. Distribution of total participants in urban and rural area by survey**  
 242 **round, sex, and age group**

| Variable  |             | Rural n (%)        |                    |                      | Urban n (%)        |                    |                      | Tribal n (%)       |                   |                     |
|-----------|-------------|--------------------|--------------------|----------------------|--------------------|--------------------|----------------------|--------------------|-------------------|---------------------|
|           |             | Round One (n=4748) | Round Two (n=3299) | Round Three (n=2728) | Round One (n=4023) | Round Two (n=2715) | Round Three (n=2164) | Round One (n=1339) | Round Two (n=489) | Round Three (n=672) |
| Sex       | Male        | 2060 (43.4)        | 1349 (40.9)        | 1057 (38.7)          | 1906 (47.4)        | 1240 (45.7)        | 956 (44.2)           | 554 (41.4)         | 178 (36.4)        | 262 (38.9)          |
|           | Female      | 2688 (56.6)        | 1950 (59.1)        | 1671 (61.3)          | 2117 (52.6)        | 1475 (54.3)        | 1208 (55.8)          | 785 (58.6)         | 311 (63.6)        | 410 (61.1)          |
| Age Group | 1-4 years   | 35 (0.7)           | 25 (0.7)           | 20 (0.7)             | 10 (0.3)           | 5 (0.2)            | 4 (0.2)              | 0                  | 0                 | 0                   |
|           | 5-9 years   | 179 (3.4)          | 120 (3.6)          | 101 (3.7)            | 130 (3.2)          | 83 (3.1)           | 64 (2.9)             | 13 (0.9)           | 4 (0.8)           | 6 (0.9)             |
|           | 10-14 years | 386 (8.1)          | 276 (8.4)          | 225 (8.3)            | 283 (7.0)          | 195 (7.2)          | 148 (6.8)            | 50 (3.7)           | 7 (1.4)           | 21 (3.1)            |
|           | 15-19 years | 430 (9.1)          | 291 (8.8)          | 231 (8.5)            | 285 (7.1)          | 180 (6.6)          | 114 (5.3)            | 80 (5.9)           | 13 (2.6)          | 30 (4.5)            |
|           | 20-29 years | 747 (15.7)         | 473 (14.3)         | 389 (14.3)           | 581 (14.4)         | 348 (12.8)         | 247 (11.4)           | 242 (18.1)         | 74 (15.1)         | 92 (13.7)           |
|           | 30-39 years | 795 (16.7)         | 549 (16.7)         | 450 (16.5)           | 638 (15.8)         | 412 (15.2)         | 353 (16.3)           | 290 (21.6)         | 108 (22.1)        | 173 (25.7)          |
|           | 40-49 years | 784 (16.5)         | 550 (16.7)         | 476 (17.5)           | 748 (18.6)         | 502 (18.5)         | 414 (19.1)           | 261 (19.5)         | 99 (20.3)         | 139 (20.7)          |
|           | 50-59 years | 616 (12.9)         | 428 (12.9)         | 357 (13.1)           | 621 (15.4)         | 442 (16.3)         | 353 (16.3)           | 188 (14.0)         | 92 (18.8)         | 96 (14.3)           |
|           | 60-69 years | 475 (10.0)         | 359 (10.8)         | 292 (10.7)           | 492 (12.2)         | 371 (13.6)         | 323 (14.9)           | 129 (9.6)          | 57 (11.6)         | 75 (11.9)           |
|           | 70+ years   | 301 (6.3)          | 228 (6.9)          | 187 (6.8)            | 235 (5.8)          | 177 (6.5)          | 144 (6.7)            | 86 (6.4)           | 35 (7.2)          | 40 (5.9)            |

243

244 Of those lost to follow-up in urban areas, 655 (50%) participants in round two and 469 (32.3%)  
 245 participants in round three were not traceable even after three domiciliary visits. The second most  
 246 common reason for attrition was refusal to continue participation in the study (37.2% in urban,  
 247 47.3% in rural, and 98.9% in tribal areas). In round three, the proportion who refused to  
 248 participate was higher than those who couldn't be traced. (Supplementary Table 4.)

249 **Supplementary Table 4. Distribution of reasons for loss to follow up participants by round**  
 250 **area**

251

| Reasons for loss to follow up | Urban                 |                         | Rural                 |                         | Tribal               |                        |
|-------------------------------|-----------------------|-------------------------|-----------------------|-------------------------|----------------------|------------------------|
|                               | Round Two n= 1308 (%) | Round Three n= 1859 (%) | Round Two n= 1449 (%) | Round Three n= 2020 (%) | Round Two n= 850 (%) | Round Three n= 667 (%) |
| Refused                       | 487 (37.2)            | 873 (46.9)              | 685 (47.3)            | 1084 (53.7)             | 841 (98.9)           | 665 (99.7)             |
| Deceased                      | 8 (0.6)               | 13 (0.7)                | 9 (0.6)               | 14 (0.7)                | 2 (0.2)              | 2 (0.2)                |

|                                                     |               |            |            |            |         |   |
|-----------------------------------------------------|---------------|------------|------------|------------|---------|---|
| <b>Sick at the time of visit</b>                    | 158<br>(12.1) | 335 (18.0) | 286 (19.7) | 379 (18.7) | 7 (0.8) | 0 |
| <b>Could not be found at home after three visit</b> | 655<br>(50.1) | 638 (34.3) | 469 (32.3) | 543 (26.8) | 0       | 0 |

252  
253 The overall seroprevalence was 73.9% (95% CI: 73.1 – 74.8) in round one which increased to  
254 90.7% (95% CI: 89.9 – 91.4) in round two and 92.9% (95% CI: 92.2 – 93.6) in round three. The  
255 highest seroprevalence in round one was at the Gorakhpur site (91.7%, 95% CI: 90.5 – 92.9)  
256 whereas the lowest was at the Bhubaneswar site (64.1%, 95% CI: 62.0 – 66.3) giving a wide range  
257 of seroprevalence across the study sites. The seroprevalence in round two was similar across all  
258 the sites ranging from 83.8% (95% CI: 82.0 – 85.6) to 94.9% (95% CI: 93.5 – 96.1). The range of  
259 seroprevalence further narrowed down in round three. **(Table 1.)**

260 **Table 1: Distribution of SARS-CoV-2 seropositive participants by site and round**  
261

| Study site         | Round One<br>n (%) |                                 | Round Two<br>n (%) |                                 | Round Three<br>n (%) |                                 |
|--------------------|--------------------|---------------------------------|--------------------|---------------------------------|----------------------|---------------------------------|
|                    | Sample size        | Seropositive<br>n (%)<br>95% CI | Sample size        | Seropositive<br>n (%)<br>95% CI | Sample size          | Seropositive<br>n (%)<br>95% CI |
| <b>Delhi</b>       | 2060               | 1373 (66.6)<br>(64.6 - 68.7)    | 1569               | 1485 (94.7)<br>(93.4 – 95.7)    | 1395                 | 1336 (95.8)<br>(94.5 – 96.7)    |
| <b>Bhubaneswar</b> | 2000               | 1283 (64.1)<br>(62.0 – 66.3)    | 1704               | 1429 (83.8)<br>(82.0 – 85.6)    | 1473                 | 1284 (87.2)<br>(85.3 – 88.8)    |
| <b>Gorakhpur</b>   | 2010               | 1845 (91.7)<br>(90.5 – 92.9)    | 1151               | 1093 (94.9)<br>(93.5 – 96.1)    | 937                  | 903 (96.4)<br>(94.9 – 97.5)     |
| <b>Agartala</b>    | 2000               | 1254 (62.7)<br>(60.5 – 64.8)    | 856                | 776 (90.7)<br>(88.5 – 92.5)     | 1095                 | 1020 (93.2)<br>(91.5 – 94.6)    |
| <b>Pondicherry</b> | 2040               | 1719 (84.2)<br>(82.6 – 85.8)    | 1222               | 1114 (91.6)<br>(89.4 – 92.6)    | 664                  | 627 (94.4)<br>(92.4 – 96.1)     |
| <b>Total</b>       | 10110              | 7474 (73.9)<br>(73.1 – 74.8)    | 6503               | 5897 (90.7)<br>(89.9 – 91.4)    | 5564                 | 5170 (92.9)<br>(92.2 -93.6)     |

262  
263 In round one the seroprevalence was higher in the urban area across all the sites; the overall  
264 seroprevalence in urban area was 81.5% and rural 69.6% and 66.7% in the tribal area. In round

265 two these were 91.1% in urban, 90.4% in rural, and 90.4% in tribal area. Whereas, in round three  
 266 it was 91.8%, 94.1%, and 91.6% in urban, rural, and tribal area respectively. **(Supplementary**  
 267 **Table 5.)**

268 **Supplementary Table 5. Distribution of SARS-CoV-2 seropositive of participants by site,**  
 269 **round and area**

270

| Sites       | Area   | Round One      |                | Round Two      |                | Round Three    |                |
|-------------|--------|----------------|----------------|----------------|----------------|----------------|----------------|
| Delhi       | Urban  | 1373<br>(66.6) | 749<br>(74.8)  | 1485<br>(94.6) | 721 (97.3)     | 1336<br>(95.8) | 679<br>(98.4)  |
|             | Rural  |                | 624<br>(58.9)  |                | 764 (92.3)     |                | 657<br>(93.2)  |
| Bhubaneswar | Urban  | 1283<br>(64.1) | 732<br>(73.2)  | 1428<br>(83.0) | 669 (81.6)     | 1284<br>(87.2) | 566<br>(80.9)  |
|             | Rural  |                | 551<br>(55.1)  |                | 759 (85.8)     |                | 718<br>(92.7)  |
| Gorakhpur   | Urban  | 1845<br>(91.7) | 948<br>(94.6)  | 1093<br>(94.9) | 537 (97.1)     | 903<br>(96.4)  | 420<br>(97.7)  |
|             | Rural  |                | 897<br>(88.9)  |                | 556 (92.9)     |                | 483<br>(95.3)  |
| Agartala    | Tribal | 1254<br>(62.7) | 893<br>(66.7)  | 777<br>(90.7)  | 442 (90.4)     | 1020<br>(93.2) | 615<br>(91.6)  |
|             | Rural  |                | 361<br>(54.6)  |                | 335 (91.0)     |                | 405<br>(95.5)  |
| Pondicherry | Urban  | 1719<br>(84.2) | 849<br>(83.2)  | 1114<br>(91.2) | 545 (90.6)     | 627<br>(94.4)  | 323<br>(93.6)  |
|             | Rural  |                | 870<br>(85.3)  |                | 569 (91.6)     |                | 304<br>(95.3)  |
| Total       | Urban  | 7474<br>(73.9) | 3278<br>(81.5) | 5897<br>(90.7) | 2472<br>(91.1) | 5170<br>(92.9) | 1988<br>(91.8) |
|             | Rural  |                | 3303<br>(69.6) |                | 2983<br>(90.4) |                | 2567<br>(94.1) |
|             | Tribal |                | 893<br>(66.7)  |                | 442 (90.4)     |                | 615<br>(91.6)  |

271

272 Sex-wise seroprevalence in round one was 73.8% among males, and 74.0% among females. In  
 273 round two it was 89.4% among males, and 91.7% among females. In round three, the  
 274 seroprevalence among males was 91% and among females, it was 94.3%. **(Table 2.)**

275

276

277

278 **Table 2: Distribution of SARS-CoV-2 seropositive participants by site, round, and sex**  
 279

|                    |                 | Agartala        |                       | Bhubaneswar     |                       | Delhi           |                       | Gorakhpur       |                       | Puducherry      |                       | Total           |                       |
|--------------------|-----------------|-----------------|-----------------------|-----------------|-----------------------|-----------------|-----------------------|-----------------|-----------------------|-----------------|-----------------------|-----------------|-----------------------|
|                    |                 | Sampl<br>e size | Sero-<br>positiv<br>e | Sampl<br>e size | Sero-<br>positiv<br>e | Sampl<br>e size | Sero-<br>positiv<br>e | Sampl<br>e size | Sero-<br>positiv<br>e | Sampl<br>e size | Sero-<br>positiv<br>e | Sampl<br>e size | Sero-<br>positiv<br>e |
|                    |                 | n               | n<br>(%)              | n               | n<br>(%)              | n               | n<br>(%)              | n               | n<br>(%)              | n               | n<br>(%)              | N               | n<br>(%)              |
| <b>Male</b>        | Roun<br>d one   | 803             | 508                   | 926             | 596                   | 930             | 588                   | 1035            | 955                   | 834             | 697                   | 4528            | 3343                  |
|                    |                 |                 | (63.3)                |                 | (64.4)                |                 | (63.2)                |                 | (92.2)                |                 | (83.6)                |                 | (73.8)                |
|                    | Roun<br>d Two   | 300             | 268                   | 780             | 642                   | 682             | 631                   | 558             | 530                   | 447             | 402                   | 2767            | 2473                  |
|                    |                 |                 | (89.3)                |                 | (82.3)                |                 | (92.5)                |                 | (95.0)                |                 | (89.9)                |                 | (89.4)                |
|                    | Roun<br>d Three | 397             | 365                   | 656             | 553                   | 573             | 538                   | 423             | 406                   | 226             | 208                   | 2275            | 2070                  |
|                    |                 |                 | (91.9)                |                 | (84.3)                |                 | (93.9)                |                 | (96.0)                |                 | (92.0)                |                 | (91.0)                |
| <b>Femal<br/>e</b> | Roun<br>d one   | 1197            | 746                   | 1074            | 687                   | 1130            | 785                   | 975             | 890                   | 1206            | 1022                  | 5582            | 4131                  |
|                    |                 |                 | (62.3)                |                 | (63.9)                |                 | (69.5)                |                 | (91.4)                |                 | (84.7)                |                 | (74.0)                |
|                    | Roun<br>d Two   | 556             | 508                   | 924             | 786                   | 887             | 854                   | 593             | 563                   | 775             | 712                   | 3736            | 3424                  |
|                    |                 |                 | (91.4)                |                 | (85.1)                |                 | (96.3)                |                 | (94.9)                |                 | (91.9)                |                 | (91.7)                |
|                    | Roun<br>d Three | 697             | 655                   | 817             | 731                   | 822             | 798                   | 513             | 497                   | 440             | 422                   | 3289            | 3101                  |
|                    |                 |                 | (93.8)                |                 | (89.5)                |                 | (97.1)                |                 | (96.7)                |                 | (95.7)                |                 | (94.3)                |

280

281 The seroprevalence among participants aged less than 18 years was 67.1%, 82.3%, and 85.1% in  
 282 rounds one, two, and three, respectively. The seroprevalence among the participants aged 18 years  
 283 or older was 75.2%, 92.2%, and 94.2% in the three rounds, respectively. **(Table 3.)**

284  
 285  
 286  
 287  
 288  
 289  
 290  
 291  
 292  
 293  
 294  
 295  
 296  
 297  
 298



299 **Table 3: Distribution of SARS-CoV-2 seropositive of participants by site, round and age**  
 300 **group (<18 years and ≥18 years)**  
 301

| Age category |             | Agartala    |                | Bhubaneshwar |                | Delhi       |                | Gorakhpur   |                | Puducherry  |                | Total       |                |
|--------------|-------------|-------------|----------------|--------------|----------------|-------------|----------------|-------------|----------------|-------------|----------------|-------------|----------------|
|              |             | Sample size | Sero-positive  | Sample size  | Sero-positive  | Sample size | Sero-positive  | Sample size | Sero-positive  | Sample size | Sero-positive  | Sample size | Sero-positive  |
|              |             | n           | n              | n            | n              | n           | n              | n           | n              | n           | n              | N           | n              |
|              |             |             | (%)            |              | (%)            |             | (%)            |             | (%)            |             | (%)            |             | (%)            |
| < 18 years   | Round one   | 230         | 108<br>(47.0)  | 320          | 175<br>(54.7)  | 281         | 183<br>(65.1)  | 339         | 282<br>(83.2)  | 372         | 286<br>(76.9)  | 1542        | 1034<br>(67.1) |
|              | Round Two   | 75          | 58<br>(77.3)   | 283          | 218<br>(77.0)  | 223         | 203<br>(91.0)  | 193         | 164<br>(85.4)  | 218         | 173<br>(79.4)  | 992         | 816<br>(82.3)  |
|              | Round Three | 111         | 95<br>(84.8)   | 244          | 198<br>(81.2)  | 183         | 164<br>(89.1)  | 165         | 148<br>(89.7)  | 92          | 73<br>(79.4)   | 795         | 678<br>(85.1)  |
| ≥ 18 years   | Round one   | 1770        | 1146<br>(64.8) | 1680         | 1108<br>(66.0) | 1779        | 1190<br>(66.9) | 1671        | 1563<br>(93.5) | 1668        | 1433<br>(86.0) | 8568        | 6440<br>(75.2) |
|              | Round Two   | 781         | 718<br>(91.9)  | 1421         | 1210<br>(85.2) | 1346        | 1282<br>(95.3) | 959         | 929<br>(96.9)  | 1004        | 941<br>(93.7)  | 5511        | 5080<br>(92.2) |
|              | Round Three | 983         | 925<br>(94.1)  | 1229         | 1086<br>(88.4) | 1210        | 1172<br>(96.8) | 772         | 755<br>(97.8)  | 575         | 557<br>(96.9)  | 4769        | 4495<br>(94.2) |

302  
 303 The proportion of symptomatic individuals among the seropositive was 26.5% overall in round  
 304 one. The proportion of symptomatic declined slightly in round two (25.1%) and further declined  
 305 to 20.1% in round three. **(Supplementary Table 6.)**

306 **Supplementary Table 6: Distribution of SARS-CoV-2 seropositive of participants by round,**  
 307 **symptom status and site**

| Round       | Symptom status    | Agartala     |            | Bhubaneswar  |             | Delhi        |             | Gorakhpur    |             | Puducherry   |             | Total        |             |
|-------------|-------------------|--------------|------------|--------------|-------------|--------------|-------------|--------------|-------------|--------------|-------------|--------------|-------------|
|             |                   | Seropositive | n (%)      | Seropositive | n (%)       | Seropositive | n (%)       | Seropositive | n (%)       | Seropositive | n (%)       | Seropositive | n (%)       |
| Round one   | Symptoms Positive | 1254         | 339 (27.0) | 1283         | 384 (29.9)  | 1373         | 443 (32.3)  | 1845         | 569 (30.8)  | 1719         | 247 (14.4)  | 7474         | 1982 (26.5) |
|             | Symptoms Negative |              | 915 (72.9) |              | 899 (70.0)  |              | 930 (67.7)  |              | 1276 (69.2) |              | 1472 (85.6) |              | 5492 (73.5) |
| Round Two   | Symptoms Positive | 776          | 290 (37.4) | 1429         | 248 (17.4)  | 1485         | 255 (17.2)  | 1093         | 612 (55.9)  | 1114         | 72 (6.5)    | 5897         | 1477 (25.1) |
|             | Symptoms Negative |              | 486 (62.6) |              | 1181 (82.6) |              | 1230 (82.8) |              | 481 (44.1)  |              | 1042 (93.5) |              | 4420 (74.9) |
| Round Three | Symptoms Positive | 1020         | 139 (13.6) | 1284         | 136 (10.6)  | 1336         | 249 (18.6)  | 903          | 459 (50.8)  | 627          | 54 (8.6)    | 5170         | 1037 (20.1) |
|             | Symptoms Negative |              | 881 (86.4) |              | 1148 (89.4) |              | 1087 (81.4) |              | 444 (49.2)  |              | 573 (91.4)  |              | 4133 (79.9) |

308  
 309 The proportion of vaccinated individuals in round one was 31.5% which increased to 58.8% in  
 310 round two and 61.0% in round three. The seroprevalence in round one among the vaccinated  
 311 individuals was 86.5% whereas among unvaccinated it was 68.1%. In subsequent rounds, the  
 312 prevalence reached nearly 95% among vaccinated and around 85% among unvaccinated. (Table  
 313 4.)

314 **Table 4: Distribution of SARS-CoV-2 seropositive of participants by round, vaccination**  
 315 **status and site**

| Round       | Vaccination status | Agartala |                    | Bhubaneswar |                    | Delhi  |                    | Gorakhpur |                    | Puducherry |                    | Total   |                    |
|-------------|--------------------|----------|--------------------|-------------|--------------------|--------|--------------------|-----------|--------------------|------------|--------------------|---------|--------------------|
|             |                    | Sample   | Seropositive n (%) | Sample      | Seropositive n (%) | Sample | Seropositive n (%) | Sample    | Seropositive n (%) | Sample     | Seropositive n (%) | Sample* | Seropositive n (%) |
| Round one   | Yes                | 728      | 621 (85.3)         | 778         | 582 (74.8)         | 214    | 148 (69.2)         | 727       | 706 (97.1)         | 738        | 699 (94.7)         | 3186    | 2756 (86.5)        |
|             | No                 | 1272     | 633 (49.8)         | 1222        | 701 (57.4)         | 1844   | 1224 (66.4)        | 1275      | 1132 (88.8)        | 1301       | 1019 (78.3)        | 6915    | 4709 (68.1)        |
| Round Two   | Yes                | 601      | 570 (94.8)         | 1072        | 928 (86.6)         | 635    | 614 (96.7)         | 745       | 729 (97.9)         | 769        | 756 (98.3)         | 3822    | 3597 (94.1)        |
|             | No                 | 255      | 206 (80.8)         | 631         | 499 (79.1)         | 933    | 871 (93.3)         | 401       | 359 (89.5)         | 452        | 358 (79.0)         | 2672    | 2293 (85.8)        |
| Round Three | Yes                | 763      | 740 (97.0)         | 1144        | 1013 (88.5)        | 876    | 856 (97.7)         | 712       | 696 (97.7)         | 505        | 496 (98.2)         | 4000    | 3801 (95.0)        |
|             | No                 | 332      | 280 (84.3)         | 328         | 270 (82.3)         | 510    | 472 (92.6)         | 223       | 205 (91.9)         | 162        | 134 (82.7)         | 1555    | 1361 (87.5)        |

316 \*9 participants didn't had idea of their vaccination status across all three rounds

317  
 318 Among the seropositive rural participants in round one, 98.2% remained positive in round 2. This  
 319 percentage remained stable in the urban and tribal areas and in round three also. Among the  
 320 seronegative participants, 73.5% in rural, 60.5% in the urban area, and 78.2% in the tribal area  
 321 were converted to seropositive in round two. In round three, among seropositive, 45.6% in rural,  
 322 25.7% in urban, and 33.3% in tribal area seroconverted to positive. **(Table 5.)**

323  
 324  
 325  
 326  
 327  
 328  
 329  
 330  
 331  
 332  
 333

334 **Table 5. Distribution of participants by change in SARS-CoV-2 seropositivity status by round**  
 335 **and area**

| Ba<br>se<br>line    | Rural              |                 |                     |                  |                 |                     | Urban            |                 |                     |                  |                 |                     | Tribal        |                 |                     |               |                 |                     |
|---------------------|--------------------|-----------------|---------------------|------------------|-----------------|---------------------|------------------|-----------------|---------------------|------------------|-----------------|---------------------|---------------|-----------------|---------------------|---------------|-----------------|---------------------|
|                     | Round Two*         |                 |                     | Round Three†     |                 |                     | Round Two‡       |                 |                     | Round Three      |                 |                     | Round Two§    |                 |                     | Round Three¶  |                 |                     |
|                     | n                  | Pos<br>n<br>(%) | Ne<br>g<br>n<br>(%) | n                | Pos<br>n<br>(%) | Ne<br>g<br>n<br>(%) | n                | Pos<br>n<br>(%) | Ne<br>g<br>n<br>(%) | n                | Pos<br>n<br>(%) | Ne<br>g<br>n<br>(%) | n             | Pos<br>n<br>(%) | Ne<br>g<br>n<br>(%) | n             | Pos<br>n<br>(%) | Ne<br>g<br>n<br>(%) |
| Se<br>ro<br>+v<br>e | 222<br>2<br>6<br>2 | 40<br>(1.7)     | 20<br>95            | 207<br>1<br>(.8) | 24<br>(1.2)     | 21<br>97            | 215<br>7<br>(.2) | 40<br>(1.8)     | 17<br>15            | 167<br>2<br>(.5) | 43<br>(2.5)     | 3<br>7              | 308<br>(97.2) | 9<br>(2.8)      | 2<br>3              | 291<br>(98.9) | 2<br>(0.6)      |                     |
| Se<br>ro<br>-<br>ve | 1028               | 756<br>(73.5)   | 272<br>(26.5)       | 219              | 100<br>(45.6)   | 119<br>(54.3)       | 512              | 310<br>(60.5)   | 201<br>(39.3)       | 166              | 43<br>(25.7)    | 123<br>(73.6)       | 169           | 133<br>(78.2)   | 36<br>(21.2)        | 26            | 9<br>(33.3)     | 17<br>(62.9)        |

336 \*5 borderline in first round got positive in round 2.

337 † 4 borderline in round 2 got positive in round 3

338 ‡ Out of 6 borderline in round 1, 5 were positive and 1 were negative in round 2

339 § Out of the 2 borderline in first round, 1 got positive and 1 got negative in round 2

340 ¶ 1 borderline of round 2 got positive in round 3

341

## 342 DISCUSSION

343 This nationwide multicentric population-based seroepidemiological cohort study attempted to find  
 344 the serum antibody prevalence against SARS-CoV-2 virus among the general population up to 6<sup>th</sup>  
 345 month after the initial serological assessment. The data collection period in round one coincided  
 346 with the before and after the second wave of SARS-CoV-2 infection in India. The round two data  
 347 were collected during and after the second wave but before the third wave whereas the round three  
 348 data collection was done before and after the third wave. At the end of three round more than 50%  
 349 participants remained in the study. The rural area participants remained more in the first follow-up  
 350 due which may be due to the inherent non-migratory nature and integrity of the area but during the

351 third round lost to follow-up was more compared to the urban area. This may be due to the loss of  
352 importance of the pandemic to the rural general population.

353 The overall seroprevalence in round one was 73.9% among which the highest was in the  
354 Gorakhpur site. The Gorakhpur site being in a busy international transit point with Nepal and the  
355 rapid transmission in the whole state of Uttar Pradesh might be the reason for high seroprevalence.  
356 The prevalence was slightly more in an urban area, among the older age (>18 years) group, and  
357 among those vaccinated with the SARS-CoV-2 vaccine but was not different between males and  
358 females. Our findings were consistent with the fourth nationwide serosurvey where the overall  
359 seroprevalence was 67%; and it was not different in urban and rural areas, between male and  
360 female but was higher among vaccinated participants.[8] The seroprevalence increased to 90.7%  
361 in round two. This time the prevalence in urban areas was closer to the rural area but was slightly  
362 higher among the older age group, vaccinated participants. A study done in the similar time  
363 period of round two in Delhi reported 89.5% overall seroprevalence among the general population  
364 with higher prevalence among the older age group, but little difference between male, female,  
365 urban, and rural areas.[9] Another study was done among children and adolescents in Delhi in  
366 October 2021, which found 81.8% prevalence among the age group <18 years but no difference  
367 between urban and rural areas, male and female participants.[10] In the third round, almost in  
368 every category, the seroprevalence was high. However, among the vaccinated individuals still  
369 seroprevalence was higher. This indicates that at the time of third wave of SARS-CoV-2 infection  
370 in India, almost all individuals had evidence of past infection regardless of age, sex, or area of  
371 residence.

372 We also explored the persistence of the immunity up to 6 months after a baseline seropositive  
373 result. Our study found that nearly the whole study cohort remained seropositive at the third  
374 month and six months in urban, rural, and tribal areas. This indicates the persistence of humoral  
375 immunity against SARS-CoV-2 infection for up to six months. A similar seroepidemiological

376 cohort study done in Spain among already diagnosed cases also found that 99% of the participants  
377 had persistent antibodies at six months.[11]

378 This was a nationwide multicentric seroepidemiological study involving participants from urban,  
379 rural, and tribal areas. The study was done in a close cohort across all the sites. Even after six  
380 months of follow-up during the challenging pandemic phase, there was a considerable number of  
381 participants remained in the cohort, and at the round, three more than 50% of participants were in  
382 the study.

383 Though we could assess total antibody against SRBD the neutralizing antibody couldn't be  
384 assessed. Moreover, our follow-up was limited up to six months in this current report. We  
385 couldn't assess the adaptive immunity also to have a comprehensive understanding of the total  
386 immunity over time. We could not do RTPCR among those who were found negative in previous  
387 rounds therefore the follow-up positive antibody could also be due to reinfection or re-exposure.

388

## 389 **CONCLUSION**

390 This study explored the SARS-CoV-2 antibody prevalence in different sites, groups, and the  
391 antibody kinetics up to six months of baseline assessment. The antibody prevalence was high and  
392 increased over time. In most of the cases, the seroprevalence was not different based on the area,  
393 age group, sex, etc. However the vaccinated individual had a higher antibody prevalence. On the  
394 other hand, nearly all the participants had antibody positivity for up to six months. There is a  
395 further need for study for longer follow-up and finding actual protection from subsequent  
396 infection.

## 397 **DECLARATION**

398 **Funding:** This work was supported by a research grant (Ref No: **2020/1085497**, Purchase Order:  
399 **202630166**) from the WHO Country Office, New Delhi 110016, India.

400 **Availability of data and materials:** The data and materials are not available publicly. It can be  
401 obtained upon reasonable request to the corresponding author.

402 **Consent for publication:** Not applicable

403 **Competing Interest:** The authors declare no conflict of interest

404 **Acknowledgment:** We thank the WHO Country Office, India team particularly Dr. Mohammad  
405 Ahmad (National Professional Officer, WHO) and Dr. Anisur Rahman (Health Emergencies and  
406 Research Officer, WHO) for their continuous support. Special thanks to the participants who  
407 allowed us to investigate the extent of infection, as determined by seropositivity in the general  
408 population, in which COVID-19 virus infection has been reported.

409 **Author statement:** All co-authors have read and approved this manuscript. The corresponding  
410 author attests that all listed authors meet authorship criteria and that no others meeting the criteria  
411 have been omitted. This manuscript represents the honest work done in this multisite  
412 seroepidemiological study

#### 413 **Abbreviations**

414 SARS-CoV-2: Severe Acute Respiratory Syndrome Coronavirus-2

415 WHO: World Health Organization

416 COVID: Coronavirus Disease

417 ELISA: Enzyme-linked Immunosorbent Assay

418 AIIMS: All India Institute of Medical Sciences

419 NCR: Delhi National Capital Region

420

#### 421 **Reference:**

422 1. Wei Y, Guan J, Ning X, Li Y, Wei L, Shen S, et al. Global COVID-19 Pandemic Waves:

423 limited lessons learned worldwide over the Past Year. Eng Beijing China 2022;13:91–8.

424 2. Mukherjee S, Ray SK. Third Wave of the COVID-19 Pandemic: Prominence of initial public

425 health interference. Infect Disord Drug Targets 2022;22:e080222200919.

- 426 3. Jain VK, Iyengar KarthikeyanP, Vaishya R. Differences between First wave and Second wave  
427 of COVID-19 in India. *Diabetes Metab Syndr* 2021;15:1047–8.
- 428 4. Rackimuthu S, Hasan MM, Bardhan M, Essar MY. COVID-19 vaccination strategies and  
429 policies in India: The need for further re-evaluation is a pressing priority. *Int J Health Plann*  
430 *Manage* 2022;37:1847–50.
- 431 5. Lee ACK, Morling JR. Living with endemic COVID-19. *Public Health* 2022;205:26–7.
- 432 6. Unity Studies: Early Investigation Protocols [Internet]. [cited 2021 Jun 11]; Available from:  
433 [https://www.who.int/emergencies/diseases/novel-coronavirus-2019/technical-guidance/early-](https://www.who.int/emergencies/diseases/novel-coronavirus-2019/technical-guidance/early-investigations)  
434 [investigations](https://www.who.int/emergencies/diseases/novel-coronavirus-2019/technical-guidance/early-investigations)
- 435 7. Wantai : COVID-19 Serology and Molecular Tests [Internet]. Wantai BioPharm [cited 2021  
436 Apr 25]; Available from: <http://www.ystwt.cn/covid-19/>
- 437 8. Murhekar MV, Bhatnagar T, Thangaraj JWV, Saravanakumar V, Santhosh KM, Selvaraju S,  
438 et al. Seroprevalence of IgG antibodies against SARS-CoV-2 among the general population  
439 and healthcare workers in India, June–July 2021: A population-based cross-sectional study.  
440 *PLoS Med* 2021;18:e1003877.
- 441 9. Sharma P, Basu S, Mishra S, Gupta E, Agarwal R, Kale P, et al. SARS-CoV-2 Seroprevalence  
442 in Delhi, India, During September-October 2021: A population-based seroepidemiological  
443 study. *Cureus* 14:e27428.
- 444 10. Sharma P, Basu S, Mishra S, Singh MM. Seroprevalence of immunoglobulin G antibodies  
445 against SARS-CoV-2 in children and adolescents in Delhi, India, from January to October  
446 2021: a repeated cross-sectional analysis. *Osong Public Health Res Perspect* 2022;13:184–90.



- 447 11. Domènech-Montoliu S, Puig-Barberà J, Pac-Sa MR, Vidal-Utrillas P, Latorre-Poveda M, Del  
448 Rio-González A, et al. Persistence of Anti-SARS-CoV-2 antibodies six months after infection  
449 in an outbreak with five hundred COVID-19 cases in Borriana (Spain): A prospective cohort  
450 study. COVID 2021;1:71–82.



# Study Sites Map

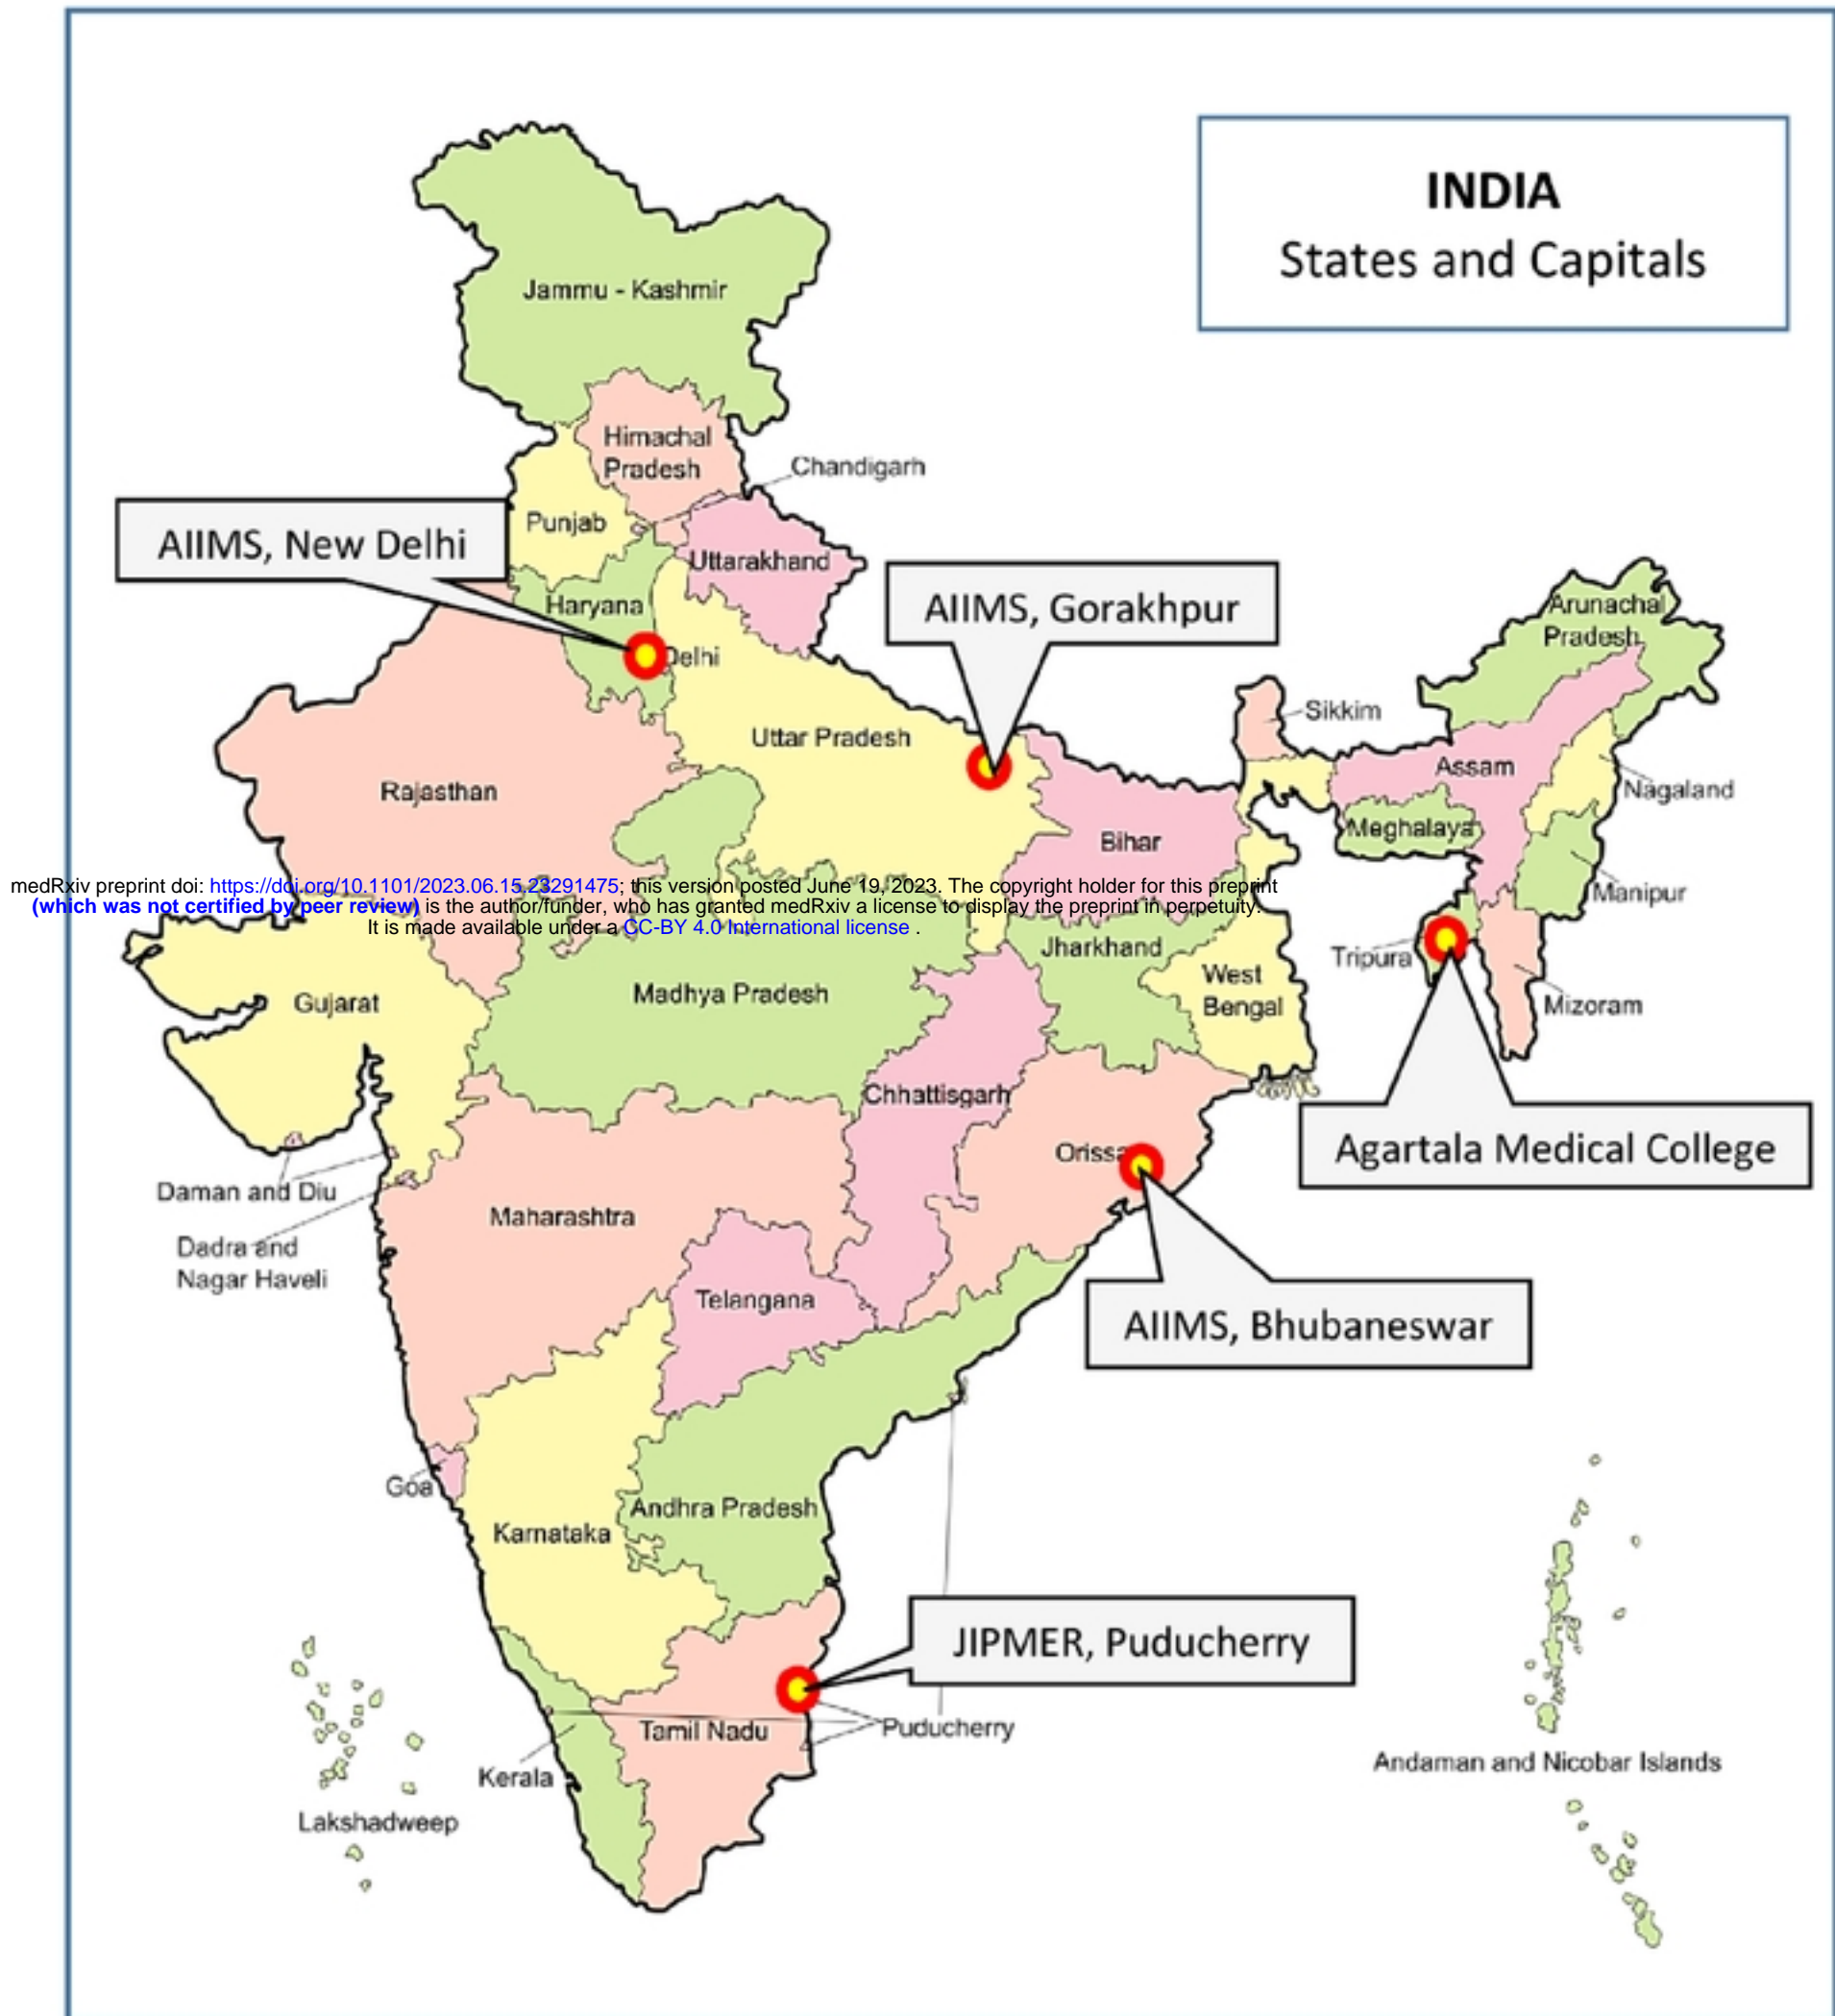

**Figure 1:** Geographical location of the study sites in India

## Partnering Institutes

1. All India Institute of Medical Sciences, New Delhi 110029, India
2. All India Institute of Medical Sciences, Bhubaneswar, Odisha- 751019, India
3. All India Institute of Medical Sciences, Gorakhpur- 273008, India
4. Jawaharlal Institute of Postgraduate Medical Education and Research, Puducherry- 605006, India
5. Agartala Government Medical College, Agartala- 799006, India
6. Translational Health Science and Technology Institute, Faridabad-121001, India

**Figure 1.** Geographical distribution of the study sites across India
